# Supplementary material for: Simulation studies of water adsorption on MIL-101(Cr) revealing the role of inhomogeneous potential field composed of open metal sites and organic linkers
Source: Royal Society of Chemistry journal article supplement (doi:10.1039/d3lf00179b), 2023-11-20
Supplement: d3lf00179b1.xlsx [file d3lf00179b1.xlsx]

## Sheet: Sheet1
cell parameter			atomic coordinates
La [A]	62.8399		type	x [A]	y [A]	z [A]
Lb [A]	62.8399		C1	-4.97937	7.55452	1.81887
Lc [A]	62.8399		C1	-18.5999	-24.1781	8.20853
alpha	60		C1	-12.8341	-0.307256	-25.5202
beta	60		C1	-24.7623	-10.9646	-25.5394
gamma	60		C1	-30.2386	6.40441	-6.53597
			C1	-27.3437	0.968969	8.22071
			C1	-21.8878	-29.4053	-6.54178
			C1	1.18474	-6.4415	6.51571
			C1	4.04664	-0.974971	-8.24893
			C1	21.8884	15.9717	25.5478
			C1	30.2189	4.01981	-8.26198
			C1	9.5502	29.4072	6.51388
			C1	6.67765	10.974	25.5487
			C1	24.7678	27.7331	1.82422
			C1	27.3725	-8.09306	1.83807
			C1	36.4154	4.24526	6.54105
			C1	12.8335	24.1715	-8.22469
			C1	18.6173	0.221306	25.3738
			C1	-9.67183	-15.9712	-25.5403
			C1	-4.04962	8.09868	-1.8244
			C1	-6.6761	-27.7487	-1.83179
			C1	-1.17973	-4.01628	8.22968
			C1	-36.4002	-7.58323	-1.82636
			C1	4.9748	-4.22971	-6.52111
			C1	4.98952	-7.5622	-1.8314
			C1	18.5938	24.1858	-8.22303
			C1	12.8557	0.283929	25.5422
			C1	24.7729	10.9696	25.5427
			C1	30.2525	-6.42241	6.52985
			C1	27.3596	-0.973279	-8.21994
			C1	21.883	29.404	6.5436
			C1	-1.18048	6.4404	-6.51722
			C1	-4.06237	0.982922	8.23109
			C1	-21.8774	-15.9678	-25.5426
			C1	-30.2305	-4.02317	8.23332
			C1	-9.55461	-29.4051	-6.51841
			C1	-6.67805	-10.9849	-25.5287
			C1	-24.7757	-27.7461	-1.82432
			C1	-27.3469	8.07198	-1.82642
			C1	-36.4103	-4.24951	-6.53736
			C1	-12.8441	-24.1696	8.24165
			C1	-18.6096	-0.312424	-25.523
			C1	9.5258	15.9676	25.5253
			C1	4.06329	-8.08008	1.81038
			C1	6.68212	27.7266	1.81684
			C1	1.17153	4.01286	-8.23772
			C1	36.4121	7.58557	1.83386
			C1	-4.98439	4.24189	6.51542
			C1	-4.15818	12.5919	-1.00718
			C1	-23.7734	-21.5805	9.03762
			C1	-7.55066	1.25085	-23.4546
			C1	-28.7821	-7.20851	-23.441
			C1	-30.5671	5.26152	-12.2682
			C1	-22.5621	4.32429	8.99512
			C1	-20.5448	-29.2449	-12.2593
			C1	0.712037	-5.14853	12.1467
			C1	8.79928	-4.22236	-8.90118
			C1	20.5413	21.2995	23.4947
			C1	30.5822	9.77312	-8.99969
			C1	10.7639	29.1225	12.2013
			C1	2.81853	7.2048	23.427
			C1	28.7811	24.5054	-1.01706
			C1	22.6188	-9.79513	-1.00566
			C1	35.5959	3.16845	12.247
			C1	7.55491	21.7021	-8.98541
			C1	23.7272	-1.28857	23.4848
			C1	-10.6068	-21.3969	-23.4103
			C1	-8.80076	9.83179	1.00249
			C1	-2.82509	-24.4896	1.00477
			C1	-0.652783	-9.81981	8.97801
			C1	-35.6166	-12.6686	1.01795
			C1	4.16373	-3.26054	-12.2209
			C1	4.09558	-12.5165	1.02769
			C1	23.7743	21.582	-9.03343
			C1	7.64423	-1.16182	23.4238
			C1	28.7105	7.14432	23.4934
			C1	30.5965	-5.25045	12.2371
			C1	22.6015	-4.3156	-8.98273
			C1	20.6388	29.2021	12.3021
			C1	-0.700865	5.15622	-12.1485
			C1	-8.82874	4.23863	8.98842
			C1	-20.6352	-21.3279	-23.4325
			C1	-30.5722	-9.8078	9.04002
			C1	-10.7612	-29.1259	-12.2089
			C1	-2.73079	-7.17747	-23.4654
			C1	-28.7105	-24.5461	1.09296
			C1	-22.5858	9.92171	1.07
			C1	-35.6061	-3.16929	-12.2243
			C1	-7.66066	-21.6397	8.92714
			C1	-23.7805	1.34016	-23.3475
			C1	10.7555	21.2275	23.3625
			C1	8.85245	-9.93662	-1.0381
			C1	2.70266	24.5229	-1.06656
			C1	0.649467	9.81541	-8.97562
			C1	35.6054	12.5769	-1.09404
			C1	-4.10407	3.2118	12.1488
			C1	-1.15348	16.6441	-3.80518
			C1	-28.4493	-18.5835	7.51563
			C1	-2.96142	0.883357	-20.0029
			C1	-30.7159	-3.02525	-20.0109
			C1	-30.3094	1.97226	-16.9772
			C1	-17.5219	6.71857	7.46844
			C1	-17.927	-27.2262	-17.0003
			C1	1.07094	-1.95591	16.945
			C1	13.8429	-6.69139	-7.50784
			C1	17.8982	25.0694	20.0044
			C1	30.3957	15.3159	-7.47752
			C1	13.4746	27.2698	16.9331
			C1	0.775351	2.97921	20.0812
			C1	30.7156	19.8802	-3.83213
			C1	17.6462	-9.2857	-3.88379
			C1	32.5035	1.8884	16.9618
			C1	2.93041	18.599	-7.43296
			C1	28.3996	-0.845946	20.0617
			C1	-13.4516	-25.0808	-20.0328
			C1	-13.823	9.32308	3.81932
			C1	-0.777462	-19.9301	3.87324
			C1	-1.11662	-15.3923	7.47558
			C1	-32.5738	-16.6606	3.8232
			C1	1.17202	-1.93178	-16.9659
			C1	1.1331	-16.6423	3.8022
			C1	28.4581	18.5745	-7.52019
			C1	2.97781	-0.875224	20.0211
			C1	30.6898	2.98008	19.9952
			C1	30.3304	-1.97414	16.9628
			C1	17.6332	-6.75233	-7.47113
			C1	17.9023	27.2305	16.9811
			C1	-1.03318	1.94561	-16.9308
			C1	-13.7643	6.79035	7.4754
			C1	-17.9003	-25.0659	-19.9982
			C1	-30.3107	-15.3477	7.51655
			C1	-13.4793	-27.2755	-16.9309
			C1	-0.764654	-2.97491	-20.0729
			C1	-30.7035	-19.8882	3.82253
			C1	-17.6281	9.30382	3.88632
			C1	-32.5696	-1.9401	-16.9628
			C1	-2.95659	-18.6729	7.45484
			C1	-28.454	0.889951	-20.0307
			C1	13.4435	25.0707	20.0207
			C1	13.8689	-9.31573	-3.85126
			C1	0.765437	19.9195	-3.87695
			C1	1.11058	15.3833	-7.4782
			C1	32.572	16.6435	-3.83142
			C1	-1.15744	1.93673	16.9617
			C1	-5.20005	14.4519	7.57452
			C1	-17.8706	-17.1114	13.7186
			C1	-13.5609	7.14917	-20.5622
			C1	-30.8218	-15.3024	-20.5594
			C1	-23.7491	10.6332	-11.0924
			C1	-21.5014	-3.23808	13.5864
			C1	-28.6572	-25.7354	-11.0992
			C1	7.70068	-10.5987	11.1046
			C1	9.87275	3.18952	-13.716
			C1	28.652	19.0449	20.5588
			C1	23.736	6.93736	-13.6997
			C1	2.74052	25.7272	11.109
			C1	0.598722	15.3214	20.5651
			C1	30.8267	24.4847	7.57225
			C1	21.5078	-11.7301	7.58648
			C1	36.6164	11.9528	11.1006
			C1	13.5603	17.1168	-13.7369
			C1	17.9325	-7.1954	20.6585
			C1	-2.67879	-19.1071	-20.6838
			C1	-9.9225	11.727	-7.58368
			C1	-0.590591	-24.4924	-7.58633
			C1	-7.6871	-6.95407	13.7094
			C1	-36.7767	-14.4474	-7.5674
			C1	5.34789	-11.9679	-11.1268
			C1	5.19411	-14.4532	-7.5821
			C1	17.8677	16.9967	-13.5964
			C1	13.5779	-7.24994	20.7133
			C1	30.886	15.3283	20.681
			C1	23.7317	-10.6083	11.1033
			C1	21.5059	3.24058	-13.5868
			C1	28.7255	25.8547	11.1023
			C1	-7.69851	10.6004	-11.1071
			C1	-9.91456	-3.23689	13.5848
			C1	-28.7229	-19.0884	-20.6754
			C1	-23.7509	-6.91453	13.7225
			C1	-2.65846	-25.8869	-11.0902
			C1	-0.598915	-15.3104	-20.564
			C1	-30.8884	-24.6108	-7.55387
			C1	-21.5025	11.7288	-7.5776
			C1	-36.6151	-11.9548	-11.1008
			C1	-13.5599	-17.001	13.5906
			C1	-17.8578	7.239	-20.7069
			C1	2.66775	19.1168	20.6743
			C1	9.91403	-11.7328	7.5784
			C1	0.503042	24.6548	7.58342
			C1	7.75055	6.95795	-13.5825
			C1	36.7513	14.4436	7.55599
			C1	-5.3384	11.9681	11.1223
			C1	-5.15085	11.9433	2.37645
			C1	-20.6722	-21.0978	10.6377
			C1	-10.7286	2.97613	-23.3844
			C1	-28.6196	-10.7622	-23.3704
			C1	-28.5921	7.58493	-10.4858
			C1	-23.5771	1.24196	10.5884
			C1	-23.5759	-28.449	-10.5063
			C1	2.86179	-7.52925	10.4425
			C1	7.76238	-1.20135	-10.6155
			C1	23.5701	19.3862	23.317
			C1	28.5787	7.33857	-10.6182
			C1	7.7473	28.5165	10.454
			C1	2.81905	10.8064	23.4014
			C1	28.6124	25.6082	2.35152
			C1	23.6437	-10.4055	2.3901
			C1	36.4463	6.19685	10.5011
			C1	10.7136	21.0436	-10.5946
			C1	20.6005	-2.90746	23.5454
			C1	-7.69275	-19.3536	-23.5169
			C1	-7.76837	10.3755	-2.40501
			C1	-2.80678	-25.6791	-2.38893
			C1	-2.84199	-7.40324	10.5847
			C1	-36.4974	-11.9789	-2.357
			C1	5.1467	-6.23759	-10.471
			C1	5.0839	-11.9186	-2.39794
			C1	20.6694	21.0939	-10.6367
			C1	10.7668	-2.98483	23.4142
			C1	28.5836	10.7276	23.3293
			C1	28.5758	-7.55978	10.4567
			C1	23.5894	-1.24081	-10.5841
			C1	23.6385	28.5064	10.5092
			C1	-2.86117	7.52672	-10.442
			C1	-7.77272	1.23032	10.6231
			C1	-23.6367	-19.4047	-23.3724
			C1	-28.5981	-7.35831	10.6458
			C1	-7.74151	-28.5268	-10.4564
			C1	-2.79753	-10.7724	-23.3803
			C1	-28.5864	-25.5671	-2.33815
			C1	-23.5783	10.3847	-2.35255
			C1	-36.4319	-6.19292	-10.5053
			C1	-10.7726	-21.0783	10.6065
			C1	-20.669	3.01084	-23.4273
			C1	7.7342	19.3673	23.4132
			C1	7.77759	-10.4293	2.37644
			C1	2.78183	25.6172	2.35931
			C1	2.83899	7.41563	-10.5616
			C1	36.4347	11.9657	2.33796
			C1	-5.13169	6.23919	10.4437
			C1	-8.29484	16.7652	11.8864
			C1	-15.7862	-15.2086	18.6498
			C1	-15.7758	12.5408	-20.5301
			C1	39.7953	16.7672	11.8555
			C1	15.8079	15.2605	-18.7097
			C1	15.8079	-12.5732	20.5993
			C1	-39.8169	-16.7662	-11.8767
			C1	8.29681	-16.7793	-11.8926
			C1	-34.4187	-19.854	-20.6447
			C1	-21.0699	15.5793	-11.9091
			C1	-21.0482	-6.04576	18.6506
			C1	-34.4127	-26.0672	-11.8583
			C1	10.3693	-15.5649	11.9014
			C1	10.3977	5.97007	-18.6433
			C1	34.4025	19.8834	20.6229
			C1	21.0657	6.0737	-18.6412
			C1	-2.96554	26.1081	11.9501
			C1	-2.95645	19.912	20.5747
			C1	34.4352	26.0967	11.8497
			C1	21.0713	-15.5679	11.9248
			C1	2.97188	-19.8922	-20.5585
			C1	-10.3725	15.5674	-11.8975
			C1	2.97994	-25.9857	-11.95
			C1	-10.3709	-6.01696	18.6407
			C1	-9.78374	21.2805	15.0894
			C1	-15.7398	-11.6517	23.1309
			C1	-15.6903	17.9583	-18.6677
			C1	41.3746	21.2973	15.0258
			C1	15.6508	11.6146	-23.1129
			C1	15.7377	-17.9813	18.6931
			C1	-41.2366	-21.3287	-15.0912
			C1	9.89469	-21.3053	-15.0505
			C1	-39.0882	-22.544	-18.6983
			C1	-17.9567	19.1983	-15.0753
			C1	-17.8874	-7.73264	23.1229
			C1	-39.122	-25.2151	-15.0207
			C1	13.5256	-19.218	15.0186
			C1	13.5602	7.78169	-23.0673
			C1	39.0722	22.5894	18.6871
			C1	17.9598	7.81328	-23.1359
			C1	-7.68034	25.0857	15.0201
			C1	-7.64816	22.5859	18.6926
			C1	39.1189	25.111	15.0493
			C1	17.9588	-19.2148	15.0597
			C1	7.69434	-22.5784	-18.7552
			C1	-13.5246	19.2	-15.0364
			C1	7.77635	-25.0826	-14.9975
			C1	-13.5167	-7.85923	23.0726
			C1	-9.19874	13.865	9.80301
			C1	15.7424	-10.1179	23.39
			C1	-40.6306	-13.8377	-9.81333
			C1	-15.6921	-18.6737	17.3168
			C1	-15.6877	10.1136	-23.3781
			C1	9.20571	-13.8614	-9.79776
			C1	15.7447	18.6801	-17.3278
			C1	40.6238	13.8312	9.77958
			C1	-32.2779	-28.2666	-9.77749
			C1	24.0212	-14.9029	9.7948
			C1	7.39563	4.27211	-17.3111
			C1	24.0215	4.26767	-17.3163
			C1	-0.876112	18.6495	23.3824
			C1	-32.288	-18.6293	-23.3905
			C1	0.925869	-28.2524	-9.77908
			C1	-7.39287	-4.27454	17.3142
			C1	-24.0185	14.9122	-9.77794
			C1	0.888163	-18.6545	-23.3749
			C1	-7.40726	14.9013	-9.80208
			C1	-24.023	-4.2447	17.3196
			C1	7.40104	-14.9027	9.80323
			C1	32.2842	28.2621	9.77114
			C1	-0.882571	28.2838	9.82231
			C1	32.2968	18.6446	23.3789
			C1	-13.8514	11.1273	7.88611
			C1	-15.6106	-28.1317	-22.2013
			C1	17.4733	-11.1946	-7.92928
			C1	15.6438	30.3356	19.2159
			C1	15.6009	28.143	22.2068
			C1	13.8323	-11.016	-7.91686
			C1	-15.6141	-30.324	-19.2182
			C1	-17.5305	11.1677	7.76043
			C1	-0.978572	20.7315	-7.91049
			C1	-34.1012	-17.5545	7.85951
			C1	2.64704	1.62715	-19.2053
			C1	-34.1233	1.52651	-19.1876
			C1	-32.2787	0.523266	-22.1813
			C1	-0.916657	-0.429513	22.1682
			C1	32.3169	20.7724	-7.81651
			C1	-2.65109	-1.61637	19.2024
			C1	34.0902	17.5754	-7.92461
			C1	32.1688	-0.564439	22.2043
			C1	-2.74764	17.5488	-7.74244
			C1	34.0858	-1.58213	19.1986
			C1	2.73441	-17.5531	7.74117
			C1	0.981591	-20.7337	7.91501
			C1	-32.275	-20.7372	7.88764
			C1	0.916797	0.424957	-22.1702
			C1	-4.82992	17.6087	9.65027
			C1	-17.9609	-13.6839	15.4026
			C1	-13.4089	9.99786	-18.1185
			C1	-33.3829	-16.6372	-18.0952
			C1	-20.8371	11.6251	-13.3349
			C1	-18.5999	-4.7486	15.472
			C1	-31.0971	-23.9205	-13.3712
			C1	10.548	-11.6707	13.3854
			C1	12.8383	4.78373	-15.4626
			C1	31.0985	20.5921	18.0998
			C1	20.7988	8.71823	-15.3932
			C1	0.361086	23.9381	13.354
			C1	-1.93992	16.6054	18.1082
			C1	33.384	22.6107	9.65462
			C1	18.6041	-13.0025	9.62502
			C1	36.2766	14.9685	13.3783
			C1	13.4155	13.7339	-15.4734
			C1	17.9904	-9.97825	18.1203
			C1	-0.346735	-20.5306	-18.0491
			C1	-12.8403	12.9868	-9.65561
			C1	1.96586	-22.6081	-9.64245
			C1	-10.5292	-8.73268	15.4528
			C1	-36.2685	-17.6058	-9.65942
			C1	4.83201	-14.9419	-13.3838
			C1	4.82529	-17.6035	-9.65726
			C1	17.9955	13.7598	-15.4419
			C1	13.4097	-9.98201	18.1136
			C1	33.379	16.6374	18.0819
			C1	20.792	-11.6076	13.3471
			C1	18.608	4.73635	-15.4629
			C1	31.1032	23.9213	13.3781
			C1	-10.5529	11.6693	-13.388
			C1	-12.833	-4.77559	15.4577
			C1	-31.1026	-20.5875	-18.0913
			C1	-20.9141	-8.72411	15.4143
			C1	-0.394465	-23.921	-13.3676
			C1	1.93525	-16.6008	-18.1049
			C1	-33.3678	-22.5984	-9.66961
			C1	-18.608	12.9891	-9.62175
			C1	-36.2691	-14.9695	-13.3837
			C1	-13.4107	-13.7453	15.4464
			C1	-17.9877	9.96715	-18.0695
			C1	0.349002	20.5111	18.001
			C1	12.8379	-12.9912	9.65385
			C1	-1.96164	22.6137	9.63434
			C1	10.5472	8.72863	-15.461
			C1	36.2595	17.6063	9.65579
			C1	-4.83105	14.9608	13.3898
			C1	50.0361	22.8885	16.2052
			C1	44.8788	25.8735	24.6276
			C1	44.3281	23.0251	16.2807
			C1	-44.3087	-23.004	-16.2747
			C1	-49.962	-22.8703	-16.3145
			C1	44.8668	31.7948	16.2371
			C1	-42.0257	-24.2673	-19.9648
			C1	-42.0745	-26.875	-16.2774
			C1	42.0295	24.2646	19.9612
			C1	42.0279	26.9106	16.2429
			C1	-44.902	-31.769	-16.2573
			C1	-44.8469	-25.9273	-24.6238
			C1	-47.1552	-29.8163	-24.5514
			C1	-47.1508	-33.0448	-19.9132
			C1	-49.4086	-31.787	-16.1931
			C1	-52.1703	-26.8519	-16.2622
			C1	-49.4211	-25.9941	-24.6056
			C1	-52.1558	-24.2934	-19.9352
			C1	52.2658	24.3461	19.8885
			C1	49.3865	25.9921	24.5428
			C1	52.3064	26.8407	16.2911
			C1	49.4033	31.7521	16.2154
			C1	47.2184	29.8255	24.6202
			C1	47.1356	33.0217	19.9194
			C2	-4.89464	6.62071	2.95953
			C2	-17.1296	-24.2073	8.0683
			C2	-14.3123	-0.458245	-25.5053
			C2	-23.9256	-12.1908	-25.5299
			C2	-29.5324	6.70001	-5.26421
			C2	-28.1153	-0.290941	8.07642
			C2	-22.5194	-28.9552	-5.27526
			C2	1.88282	-6.73938	5.24839
			C2	3.27317	0.276387	-8.1152
			C2	22.5187	14.6275	25.5427
			C2	29.5228	2.72351	-8.10585
			C2	8.94582	28.9422	5.24915
			C2	7.55214	12.1667	25.5414
			C2	23.9339	28.1334	2.9861
			C2	28.1521	-7.53016	2.96136
			C2	36.3357	5.01544	5.27595
			C2	14.3072	24.215	-8.07665
			C2	17.1467	0.406661	25.4232
			C2	-9.00052	-14.6301	-25.5143
			C2	-3.27677	7.55267	-2.95653
			C2	-7.55044	-28.1402	-2.95395
			C2	-1.88496	-2.71709	8.10564
			C2	-36.3279	-6.656	-2.98373
			C2	4.89151	-4.99398	-5.25861
			C2	4.89971	-6.61771	-2.96302
			C2	17.123	24.2209	-8.07876
			C2	14.3292	0.436028	25.5119
			C2	23.9285	12.1894	25.5367
			C2	29.5522	-6.70887	5.25932
			C2	28.1352	0.279584	-8.07312
			C2	22.5227	28.9472	5.28324
			C2	-1.87512	6.74168	-5.25184
			C2	-3.29085	-0.277215	8.10643
			C2	-22.5201	-14.6297	-25.5321
			C2	-29.5124	-2.73326	8.08877
			C2	-8.95106	-28.9434	-5.2545
			C2	-7.54297	-12.2	-25.5177
			C2	-23.9293	-28.1454	-2.97421
			C2	-28.1226	7.51611	-2.96422
			C2	-36.3325	-5.02452	-5.27574
			C2	-14.3158	-24.2085	8.08901
			C2	-17.1328	-0.454775	-25.5015
			C2	8.9319	14.6142	25.5194
			C2	3.29247	-7.54341	2.95341
			C2	7.54847	28.1216	2.94812
			C2	1.87457	2.71616	-8.11288
			C2	36.3364	6.65096	2.98429
			C2	-4.89779	4.99726	5.2505
			C2	-3.36162	13.6245	-1.72088
			C2	-24.9258	-20.7309	8.65457
			C2	-6.40142	1.158	-22.52
			C2	-29.271	-6.1562	-22.5143
			C2	-30.4179	4.41996	-13.4804
			C2	-21.2408	4.89784	8.60102
			C2	-19.8967	-28.6669	-13.4785
			C2	0.840492	-4.3095	13.3708
			C2	10.1021	-4.8354	-8.50952
			C2	19.8965	22.2554	22.5404
			C2	30.4689	11.1957	-8.5952
			C2	11.4352	28.5856	13.415
			C2	2.31033	6.14611	22.5145
			C2	29.2687	23.2803	-1.69836
			C2	21.3192	-9.62251	-1.70704
			C2	34.7631	2.89982	13.4593
			C2	6.40249	20.8462	-8.58697
			C2	24.9033	-1.13928	22.5776
			C2	-11.3723	-22.3173	-22.5488
			C2	-10.0905	9.6637	1.73071
			C2	-2.31865	-23.2806	1.70806
			C2	-0.821557	-11.2507	8.57641
			C2	-34.8004	-13.7025	1.70207
			C2	3.36948	-2.93224	-13.4335
			C2	3.30522	-13.5612	1.73814
			C2	24.9339	20.7364	-8.65058
			C2	6.4644	-1.07438	22.5149
			C2	29.2135	6.10642	22.5449
			C2	30.4767	-4.40407	13.451
			C2	21.2891	-4.86811	-8.58147
			C2	19.9682	28.645	13.5115
			C2	-0.835855	4.31662	-13.3721
			C2	-10.1267	4.83762	8.58603
			C2	-19.9609	-22.2741	-22.502
			C2	-30.4247	-11.2302	8.64982
			C2	-11.4289	-28.5868	-13.4226
			C2	-2.23588	-6.13515	-22.535
			C2	-29.2054	-23.3116	1.75191
			C2	-21.2762	9.72939	1.73021
			C2	-34.7848	-2.8967	-13.433
			C2	-6.47892	-20.8344	8.5319
			C2	-24.9384	1.25159	-22.4267
			C2	11.4469	22.1892	22.4685
			C2	10.1534	-9.75691	-1.74296
			C2	2.21605	23.2921	-1.72737
			C2	0.820467	11.2441	-8.57798
			C2	34.784	13.6259	-1.75562
			C2	-3.32137	2.87786	13.3739
			C2	-1.90345	15.6089	-3.05531
			C2	-27.2069	-19.2855	7.90767
			C2	-4.18203	0.997161	-20.8277
			C2	-30.2196	-4.14816	-20.8296
			C2	-30.3023	2.81904	-15.7657
			C2	-18.7785	6.04526	7.87908
			C2	-18.6647	-27.6736	-15.7946
			C2	1.05823	-2.78072	15.7112
			C2	12.5679	-6.01699	-7.8645
			C2	18.6595	24.0967	20.8257
			C2	30.3657	13.8904	-7.86538
			C2	12.7547	27.6954	15.7135
			C2	1.3061	4.1133	20.8711
			C2	30.2193	21.0196	-3.03511
			C2	18.8871	-9.38905	-3.07474
			C2	33.2638	2.31726	15.7608
			C2	4.16237	19.3116	-7.85825
			C2	27.1788	-0.942276	20.9195
			C2	-12.754	-24.1079	-20.9068
			C2	-12.5411	9.44083	3.07875
			C2	-1.30875	-21.0629	3.08344
			C2	-1.0849	-13.965	7.87963
			C2	-33.3177	-15.6549	3.03799
			C2	1.91918	-2.30173	-15.7423
			C2	1.87139	-15.5943	3.04867
			C2	27.2204	19.2905	-7.90713
			C2	4.20959	-0.965408	20.8457
			C2	30.2057	4.1081	20.8302
			C2	30.3552	-2.80875	15.7429
			C2	18.8678	-6.03963	-7.84875
			C2	18.6654	27.6785	15.7937
			C2	-1.04585	2.78007	-15.7041
			C2	-12.5427	6.0494	7.86982
			C2	-18.6594	-24.0906	-20.8154
			C2	-30.3069	-13.9206	7.90549
			C2	-12.7467	-27.6919	-15.7146
			C2	-1.27763	-4.11056	-20.8667
			C2	-30.1892	-21.037	3.04542
			C2	-18.8569	9.42583	3.0797
			C2	-33.3062	-2.33766	-15.7411
			C2	-4.20697	-19.3697	7.83026
			C2	-27.2148	1.02416	-20.8262
			C2	12.7482	24.0628	20.8512
			C2	12.6081	-9.47005	-3.07702
			C2	1.27511	21.0461	-3.07849
			C2	1.08736	13.9583	-7.88143
			C2	33.3103	15.6184	-3.06089
			C2	-1.89411	2.29709	15.7235
			C2	-5.09373	13.8548	6.21546
			C2	-18.6208	-18.0677	12.867
			C2	-12.7968	6.04192	-21.2068
			C2	-30.2355	-14.0934	-21.2038
			C2	-24.9481	9.77374	-10.9703
			C2	-21.9663	-2.09242	12.7558
			C2	-27.3117	-26.3674	-10.9731
			C2	6.49612	-9.74724	10.9584
			C2	9.39577	2.06909	-12.8706
			C2	27.3059	19.1341	21.1944
			C2	24.9379	7.09687	-12.8458
			C2	4.0882	26.3548	11.0063
			C2	1.17696	14.107	21.2024
			C2	30.2405	24.6892	6.21572
			C2	21.9682	-11.3281	6.22783
			C2	36.4936	10.4716	10.9737
			C2	12.8101	18.0749	-12.8843
			C2	18.6892	-6.08247	21.3284
			C2	-4.01938	-19.1833	-21.327
			C2	-9.47089	11.3153	-6.22843
			C2	-1.17106	-24.6982	-6.22978
			C2	-6.47421	-7.10576	12.8652
			C2	-36.6262	-13.8291	-6.22296
			C2	5.22459	-10.4967	-10.9911
			C2	5.06197	-13.8543	-6.22838
			C2	18.6386	17.9707	-12.7694
			C2	12.824	-6.12804	21.3278
			C2	30.2617	14.1285	21.2993
			C2	24.932	-9.74969	10.9664
			C2	21.9686	2.09027	-12.7551
			C2	27.3778	26.4659	10.9629
			C2	-6.49401	9.74982	-10.9598
			C2	-9.44953	-2.08772	12.7627
			C2	-27.3758	-19.1568	-21.2983
			C2	-24.9541	-7.09136	12.8717
			C2	-4.00963	-26.4887	-10.9716
			C2	-1.1766	-14.0944	-21.2036
			C2	-30.2651	-24.7929	-6.216
			C2	-21.9643	11.3273	-6.21848
			C2	-36.4917	-10.4747	-10.9723
			C2	-12.7981	-17.9727	12.7599
			C2	-18.6132	6.12187	-21.3227
			C2	4.00656	19.1876	21.3054
			C2	9.45298	-11.3408	6.21927
			C2	1.10219	24.8355	6.23547
			C2	6.52203	7.12528	-12.7554
			C2	36.5939	13.8108	6.21884
			C2	-5.21139	10.4991	10.9827
			C2	-5.05781	12.6176	3.70102
			C2	-19.98	-19.989	11.3517
			C2	-11.4306	4.00938	-22.5732
			C2	-29.1569	-11.8944	-22.5709
			C2	-27.2895	8.27015	-10.6789
			C2	-22.977	0.0730582	11.2915
			C2	-24.8391	-27.6739	-10.6611
			C2	4.17031	-8.21667	10.6299
			C2	8.38371	-0.0459945	-11.3246
			C2	24.8312	19.2774	22.5296
			C2	27.2716	7.30535	-11.3298
			C2	6.51965	27.7044	10.6698
			C2	2.27054	11.9165	22.5718
			C2	29.1517	25.2348	3.68582
			C2	23.0067	-10.6715	3.70941
			C2	36.4019	7.67796	10.6626
			C2	11.4263	19.9591	-11.3282
			C2	19.968	-3.99719	22.7467
			C2	-6.46272	-19.2866	-22.7043
			C2	-8.40345	10.6284	-3.726
			C2	-2.25715	-25.2622	-3.7093
			C2	-4.143	-7.32463	11.3129
			C2	-36.4668	-12.6327	-3.69299
			C2	5.08592	-7.71437	-10.6653
			C2	4.98631	-12.5934	-3.72099
			C2	19.9831	19.9673	-11.3297
			C2	11.4579	-4.03279	22.6084
			C2	29.1314	11.8844	22.5621
			C2	27.2683	-8.24292	10.6576
			C2	22.9872	-0.0736427	-11.2896
			C2	24.899	27.7381	10.6822
			C2	-4.16867	8.21694	-10.6309
			C2	-8.40006	0.0667627	11.3067
			C2	-24.8972	-19.3115	-22.5906
			C2	-27.2936	-7.31195	11.3595
			C2	-6.49444	-27.7369	-10.6625
			C2	-2.25651	-11.8973	-22.5683
			C2	-29.1353	-25.2339	-3.68405
			C2	-22.9839	10.6648	-3.68919
			C2	-36.3971	-7.67642	-10.659
			C2	-11.4512	-19.9484	11.2984
			C2	-19.9756	4.05234	-22.6213
			C2	6.48518	19.2988	22.6024
			C2	8.40206	-10.6898	3.70247
			C2	2.22665	25.2701	3.69939
			C2	4.14784	7.34061	-11.269
			C2	36.4129	12.6112	3.68302
			C2	-5.06525	7.71561	10.6441
			C2	-8.71234	17.9174	12.698
			C2	-15.7889	-14.2893	19.7934
			C2	-15.7377	13.9297	-20.0413
			C2	40.1854	17.9391	12.6623
			C2	15.778	14.3409	-19.8562
			C2	15.8034	-13.9634	20.1127
			C2	-40.2352	-17.9252	-12.6996
			C2	8.70545	-17.9385	-12.7051
			C2	-35.625	-20.5341	-20.1451
			C2	-20.2789	16.5021	-12.7296
			C2	-20.2293	-6.48825	19.7889
			C2	-35.6188	-25.812	-12.6656
			C2	11.1671	-16.4963	12.7173
			C2	11.1927	6.42553	-19.793
			C2	35.5942	20.5898	20.1209
			C2	20.2619	6.53962	-19.7826
			C2	-4.18069	25.8734	12.7415
			C2	-4.15106	20.6059	20.083
			C2	35.6494	25.87	12.6668
			C2	20.2765	-16.4927	12.7443
			C2	4.17631	-20.565	-20.0518
			C2	-11.1686	16.4985	-12.7127
			C2	4.20999	-25.735	-12.7225
			C2	-11.1607	-6.47668	19.7917
			C2	-9.41587	20.1141	14.2697
			C2	-15.795	-12.5357	21.9554
			C2	-15.7059	16.5605	-19.1229
			C2	40.9037	20.1667	14.1926
			C2	15.699	12.5346	-21.972
			C2	15.7796	-16.5866	19.1636
			C2	-40.8658	-20.1551	-14.274
			C2	9.46212	-20.1442	-14.253
			C2	-37.881	-21.8176	-19.149
			C2	-18.749	18.2297	-14.2922
			C2	-18.6851	-7.30195	21.9652
			C2	-37.904	-25.3528	-14.1943
			C2	12.7155	-18.2496	14.2504
			C2	12.7493	7.30902	-21.9339
			C2	37.8396	21.9137	19.1419
			C2	18.7547	7.41851	-21.9579
			C2	-6.46713	25.3356	14.2339
			C2	-6.40871	21.9306	19.1382
			C2	37.9127	25.3357	14.2263
			C2	18.759	-18.2402	14.2969
			C2	6.46975	-21.8609	-19.1499
			C2	-12.7143	18.2513	-14.2475
			C2	6.54759	-25.301	-14.196
			C2	-12.7032	-7.38767	21.9352
			C2	-10.4479	13.2232	9.35278
			C2	15.7428	-10.1885	24.8586
			C2	-41.888	-13.2127	-9.35825
			C2	-15.7128	-20.036	17.8799
			C2	-15.7196	10.1842	-24.8473
			C2	10.4572	-13.2134	-9.34926
			C2	15.7443	20.0429	-17.8866
			C2	41.8804	13.2107	9.31144
			C2	-32.3829	-29.6722	-9.34025
			C2	25.2067	-15.6631	9.34583
			C2	6.19892	3.60813	-17.8764
			C2	25.2059	3.58891	-17.8831
			C2	-0.945455	18.6941	24.8564
			C2	-32.3746	-18.6583	-24.8655
			C2	0.980964	-29.6529	-9.32067
			C2	-6.20567	-3.59554	17.8804
			C2	-25.2103	15.6643	-9.34245
			C2	0.947733	-18.7157	-24.845
			C2	-6.23723	15.6679	-9.32642
			C2	-25.2162	-3.58073	17.882
			C2	6.23063	-15.6704	9.32594
			C2	32.3853	29.6676	9.33473
			C2	-0.950444	29.682	9.36068
			C2	32.381	18.6676	24.8568
			C2	-12.6975	11.8695	8.43305
			C2	-15.6453	-28.2502	-23.669
			C2	18.6171	-11.9578	-8.46681
			C2	15.6702	31.7475	18.7872
			C2	15.6344	28.2547	23.6766
			C2	12.6979	-11.8105	-8.43906
			C2	-15.6452	-31.7346	-18.785
			C2	-18.6799	11.9103	8.31684
			C2	-1.07265	22.0991	-8.45769
			C2	-35.3374	-16.9376	8.38742
			C2	3.88084	2.32898	-18.7811
			C2	-35.3477	2.24389	-18.773
			C2	-32.3437	0.548429	-23.658
			C2	-0.978065	-0.473093	23.6432
			C2	32.3759	22.151	-8.34517
			C2	-3.88968	-2.31382	18.7821
			C2	35.3217	16.9412	-8.43221
			C2	32.2869	-0.596321	23.6746
			C2	-3.97539	16.9488	-8.3062
			C2	35.3166	-2.28152	18.7796
			C2	3.96656	-16.9527	8.30619
			C2	1.06984	-22.1045	8.45327
			C2	-32.336	-22.1159	8.40789
			C2	0.975998	0.472512	-23.6484
			C2	-4.1818	18.9458	9.70064
			C2	-18.7086	-12.403	15.5161
			C2	-12.6883	10.526	-16.9267
			C2	-34.2171	-16.2653	-16.919
			C2	-20.105	11.3023	-14.5857
			C2	-17.1164	-4.76968	15.5736
			C2	-31.1914	-23.1166	-14.6228
			C2	11.3004	-11.3424	14.6275
			C2	14.3207	4.79097	-15.5661
			C2	31.1938	21.502	16.9224
			C2	20.074	10.0096	-15.5087
			C2	0.275884	23.1074	14.5855
			C2	-2.76103	16.2538	16.9188
			C2	34.2201	21.3786	9.69547
			C2	17.1208	-13.0927	9.68342
			C2	35.6277	15.455	14.626
			C2	12.6946	12.4364	-15.586
			C2	18.7179	-10.4935	16.9285
			C2	-0.265767	-21.4437	-16.8771
			C2	-14.3226	13.0866	-9.70146
			C2	2.78609	-21.3685	-9.69362
			C2	-11.2948	-10.006	15.5623
			C2	-35.6214	-18.9475	-9.71267
			C2	4.16939	-15.4456	-14.6201
			C2	4.17547	-18.9383	-9.70284
			C2	18.7185	12.4634	-15.5358
			C2	12.6934	-10.5201	16.9242
			C2	34.2166	16.2666	16.9076
			C2	20.0716	-11.2795	14.6031
			C2	17.1234	4.76396	-15.5669
			C2	31.1989	23.1172	14.6303
			C2	-11.3041	11.3395	-14.6286
			C2	-14.315	-4.78548	15.5695
			C2	-31.1962	-21.4981	-16.9139
			C2	-20.1433	-9.99455	15.5179
			C2	-0.294443	-23.0932	-14.603
			C2	2.7578	-16.2481	-16.9146
			C2	-34.2106	-21.371	-9.71755
			C2	-17.1237	13.081	-9.68361
			C2	-35.6195	-15.4544	-14.6318
			C2	-12.6916	-12.4448	15.5542
			C2	-18.7205	10.4971	-16.8871
			C2	0.271885	21.4314	16.8356
			C2	14.3185	-13.0922	9.70024
			C2	-2.78725	21.3782	9.69827
			C2	11.2997	10.0046	-15.5805
			C2	35.6132	18.9471	9.69673
			C2	-4.16795	15.4546	14.6273
			C2	48.5693	22.8248	16.1228
			C2	45.7904	22.8976	16.1739
			C2	-45.7536	-22.8435	-16.1771
			C2	-48.5131	-22.7533	-16.1764
			C2	-42.6689	-24.6258	-21.2362
			C2	-42.6763	-28.2042	-16.166
			C2	44.0283	30.6001	16.1507
			C2	44.0514	25.4329	23.4983
			C2	42.6709	24.6467	21.2268
			C2	42.6523	28.223	16.16
			C2	-44.0624	-30.5748	-16.1702
			C2	-44.0523	-25.4338	-23.4913
			C2	-47.1603	-30.7826	-23.4538
			C2	-47.1563	-32.3583	-21.2003
			C2	-50.2348	-30.5856	-16.1245
			C2	-51.5673	-28.181	-16.1524
			C2	-50.2275	-25.4582	-23.5108
			C2	-51.5521	-24.6432	-21.2261
			C2	50.234	25.4796	23.4509
			C2	51.641	24.6787	21.1801
			C2	51.6798	28.1641	16.1861
			C2	50.2473	30.5464	16.1508
			C2	47.1661	30.7766	23.5065
			C2	47.1398	32.3365	21.2151
			C3	-5.89724	5.65043	3.14025
			C3	14.9997	29.0873	8.5258
			C3	16.3915	17.7365	24.5926
			C3	7.87707	5.34862	24.5628
			C3	32.6892	7.52048	-4.30016
			C3	33.3926	-0.347158	8.52713
			C3	8.57387	24.531	-4.27224
			C3	1.25446	-7.53427	4.27246
			C3	1.92946	0.32478	-8.5308
			C3	-8.57502	-4.15043	-24.5518
			C3	-32.6857	1.5409	-8.53734
			C3	-22.8661	-24.5362	4.27852
			C3	-23.5481	-5.32837	-24.5578
			C3	-7.87125	-24.9419	3.14647
			C3	-33.3538	-7.93068	3.1615
			C3	-25.5321	4.83422	4.27192
			C3	-16.4014	-29.0757	-8.52638
			C3	-14.9499	-17.8015	-24.6528
			C3	22.8307	4.1051	24.5833
			C3	-1.93478	7.93319	-3.1402
			C3	23.5508	24.9244	-3.15191
			C3	-1.25381	-1.5306	8.5267
			C3	25.5389	-5.6494	-3.13876
			C3	5.89641	-4.8438	-4.28404
			C3	5.90055	-5.64555	-3.14885
			C3	-15.0124	-29.0728	-8.52659
			C3	-16.3388	-17.7795	-24.6091
			C3	-7.87871	-5.35425	-24.5554
			C3	-32.6633	-7.52401	4.29582
			C3	-33.3715	0.33312	-8.52367
			C3	-8.56788	-24.5398	4.2811
			C3	-1.2414	7.53189	-4.27564
			C3	-1.94831	-0.325175	8.5279
			C3	8.57142	4.14371	24.5616
			C3	32.7047	-1.5529	8.53187
			C3	22.8576	24.5289	-4.28833
			C3	23.5423	5.30053	24.5811
			C3	7.8774	24.9301	-3.13619
			C3	33.3855	7.92437	-3.16727
			C3	25.5357	-4.84368	-4.27189
			C3	16.3874	29.0863	8.53662
			C3	15.0024	17.7373	24.5952
			C3	-22.8656	-4.1198	-24.5697
			C3	1.95184	-7.93231	3.1382
			C3	-23.5568	-24.941	3.14305
			C3	1.23821	1.53071	-8.52876
			C3	-25.5323	5.64145	3.13941
			C3	-5.89915	4.8476	4.27343
			C3	-3.86222	6.73389	3.90914
			C3	-16.4181	-23.1009	7.56811
			C3	-15.0247	-0.571241	-24.2941
			C3	-23.5762	-12.8118	-24.3174
			C3	-28.22	6.24359	-5.03376
			C3	-27.512	-1.45806	7.56727
			C3	-22.8768	-27.6067	-5.09534
			C3	3.20481	-6.30468	5.04013
			C3	3.89185	1.44992	-7.64726
			C3	22.8746	14.0132	24.3286
			C3	28.2151	2.65837	-7.58885
			C3	8.68028	27.5766	5.02822
			C3	7.99514	12.7222	24.3251
			C3	23.577	27.1959	3.97183
			C3	27.5469	-6.66207	3.89221
			C3	35.3445	5.99786	5.10247
			C3	15.0219	23.1123	-7.56857
			C3	16.4002	0.566436	24.2418
			C3	-8.70264	-13.9694	-24.3076
			C3	-3.89028	6.71066	-3.90356
			C3	-7.99272	-27.1821	-3.88717
			C3	-3.20953	-2.65919	7.63616
			C3	-35.3383	-6.81371	-3.9707
			C3	3.85994	-5.92688	-5.04562
			C3	3.86432	-6.73075	-3.91034
			C3	16.4145	23.1148	-7.57155
			C3	15.0098	0.573001	24.2851
			C3	23.5719	12.8087	24.325
			C3	28.2378	-6.25606	5.0294
			C3	27.5293	1.44776	-7.57011
			C3	22.8796	27.5982	5.10749
			C3	-3.19722	6.30934	-5.03972
			C3	-3.90482	-1.45288	7.63678
			C3	-22.8804	-14.0172	-24.3185
			C3	-28.2016	-2.66885	7.57651
			C3	-8.68356	-27.579	-5.02646
			C3	-7.98475	-12.7712	-24.3081
			C3	-23.5726	-27.2052	-3.95852
			C3	-27.5232	6.6458	-3.89589
			C3	-35.3404	-6.00665	-5.10413
			C3	-15.0257	-23.1027	7.57708
			C3	-16.4195	-0.567177	-24.2922
			C3	8.67539	13.935	24.3136
			C3	3.90236	-6.70349	3.90401
			C3	7.99251	27.1716	3.88835
			C3	3.20046	2.65684	-7.64573
			C3	35.3448	6.80694	3.97006
			C3	-3.86382	5.92893	5.04255
			C3	-2.02404	13.3946	-2.07924
			C3	-25.0703	-20.2668	7.33547
			C3	-6.29242	0.0996467	-21.6007
			C3	-28.3998	-5.53852	-21.6019
			C3	-30.0876	3.0585	-13.3698
			C3	-20.7376	4.74021	7.29624
			C3	-18.9216	-27.6561	-13.3845
			C3	1.18946	-2.95148	13.2989
			C3	10.6119	-4.7422	-7.20376
			C3	18.9283	21.8233	21.6188
			C3	30.1243	11.5566	-7.2802
			C3	12.4457	27.6141	13.3158
			C3	3.1536	5.50073	21.593
			C3	28.3992	22.2135	-1.98111
			C3	20.8038	-8.35196	-2.01435
			C3	33.4006	2.57141	13.3531
			C3	6.29203	20.3245	-7.2851
			C3	25.0883	-0.0139844	21.7563
			C3	-12.4372	-21.8599	-21.7523
			C3	-10.5733	8.40101	2.11044
			C3	-3.16161	-22.1984	2.0175
			C3	-1.18979	-11.6166	7.26966
			C3	-33.4432	-13.4795	1.9884
			C3	2.03701	-2.50273	-13.3321
			C3	1.95907	-13.3653	2.08973
			C3	25.0809	20.2695	-7.33171
			C3	6.31462	-0.0232243	21.5923
			C3	28.3602	5.46954	21.6256
			C3	30.142	-3.04273	13.3461
			C3	20.793	-4.6991	-7.27715
			C3	18.9959	27.6358	13.3969
			C3	-1.18517	2.95966	-13.2957
			C3	-10.6076	4.7279	7.27108
			C3	-18.9921	-21.8214	-21.5905
			C3	-30.0901	-11.5809	7.33087
			C3	-12.4391	-27.6156	-13.3183
			C3	-3.09714	-5.51195	-21.6155
			C3	-28.3425	-22.2438	2.0494
			C3	-20.7833	8.44246	2.00897
			C3	-33.4268	-2.55244	-13.3332
			C3	-6.34447	-20.3271	7.22826
			C3	-25.0747	0.161637	-21.55
			C3	12.4605	21.7742	21.586
			C3	10.6302	-8.4782	-2.07765
			C3	3.08601	22.2239	-2.00548
			C3	1.18862	11.6116	-7.27035
			C3	33.4269	13.4167	-2.05502
			C3	-1.98109	2.46645	13.3029
			C3	-1.2939	14.3848	-2.72949
			C3	-26.2012	-19.5475	6.96322
			C3	-5.1876	0.0163897	-20.7615
			C3	-28.8713	-4.53059	-20.7694
			C3	-30.0285	2.26152	-14.5062
			C3	-19.5205	5.30908	6.93694
			C3	-18.3136	-27.1608	-14.5349
			C3	1.31329	-2.19386	14.4596
			C3	11.8365	-5.32181	-6.88521
			C3	18.3189	22.7354	20.7672
			C3	30.0677	12.8978	-6.91756
			C3	13.1029	27.1694	14.458
			C3	2.65509	4.4945	20.7727
			C3	28.8713	21.0911	-2.65399
			C3	19.5925	-8.23478	-2.68686
			C3	32.6567	2.28561	14.4937
			C3	5.18215	19.5655	-6.92566
			C3	26.2053	0.0746822	20.9254
			C3	-13.1198	-22.75	-20.9292
			C3	-11.7945	8.28915	2.76903
			C3	-2.65915	-21.095	2.69786
			C3	-1.33058	-12.9584	6.92677
			C3	-32.707	-14.4498	2.65935
			C3	1.30968	-2.20458	-14.4788
			C3	1.24526	-14.3759	2.72818
			C3	26.2142	19.5517	-6.96213
			C3	5.19894	0.0304137	20.7608
			C3	28.8527	4.48471	20.7734
			C3	30.083	-2.24713	14.4842
			C3	19.5869	-5.28303	-6.90984
			C3	18.3481	27.1586	14.5303
			C3	-1.30799	2.19847	-14.4538
			C3	-11.8162	5.31575	6.917
			C3	-18.3425	-22.7231	-20.7549
			C3	-30.0305	-12.919	6.95998
			C3	-13.0954	-27.1689	-14.4591
			C3	-2.62293	-4.50488	-20.7831
			C3	-28.8326	-21.1096	2.68887
			C3	-19.5768	8.28851	2.68092
			C3	-32.6899	-2.27645	-14.4808
			C3	-5.21589	-19.5938	6.87926
			C3	-26.207	0.0487132	-20.7518
			C3	13.1088	22.7055	20.7823
			C3	11.8529	-8.33397	-2.72492
			C3	2.61957	21.103	-2.68013
			C3	1.33099	12.9547	-6.92719
			C3	32.6925	14.4092	-2.698
			C3	-1.26903	2.19062	14.4674
			C3	-3.96302	14.853	-2.04579
			C3	-25.929	-20.451	9.59951
			C3	-5.40363	2.14364	-22.5707
			C3	-30.6198	-5.7755	-22.5652
			C3	-30.6777	4.97623	-14.7417
			C3	-20.4877	5.61993	9.54347
			C3	-20.2701	-29.1518	-14.7439
			C3	0.617085	-4.90135	14.6297
			C3	10.8416	-5.52661	-9.48947
			C3	20.2658	23.6104	22.5727
			C3	30.7327	12.1927	-9.54909
			C3	11.0671	29.0839	14.6765
			C3	0.950549	5.78862	22.5819
			C3	30.6181	23.1994	-2.07635
			C3	20.5947	-10.7746	-2.06488
			C3	35.3605	2.96901	14.7292
			C3	5.39699	20.5636	-9.52791
			C3	25.8734	-2.16048	22.5607
			C3	-11.028	-23.6807	-22.5432
			C3	-10.8394	10.8131	2.0464
			C3	-0.958367	-23.23	2.06746
			C3	-0.60317	-12.2604	9.53124
			C3	-35.4043	-14.9122	2.0784
			C3	3.96809	-3.04277	-14.6997
			C3	3.93018	-14.7814	2.06068
			C3	25.9361	20.4562	-9.59729
			C3	5.48059	-2.08005	22.5823
			C3	30.5731	5.74583	22.5792
			C3	30.7312	-4.96637	14.7133
			C3	20.5448	-5.59383	-9.52587
			C3	20.2999	29.1451	14.7819
			C3	-0.61733	4.90534	-14.6335
			C3	-10.8866	5.52776	9.54632
			C3	-20.286	-23.6377	-22.5485
			C3	-30.686	-12.2329	9.59474
			C3	-11.0603	-29.0838	-14.6843
			C3	-0.883141	-5.75904	-22.5882
			C3	-30.5657	-23.2257	2.09065
			C3	-20.5322	10.861	2.10161
			C3	-35.3924	-2.97756	-14.6971
			C3	-5.48186	-20.5788	9.49172
			C3	-25.9404	2.23086	-22.4887
			C3	11.086	23.5444	22.5301
			C3	10.9187	-10.8873	-2.07704
			C3	0.864968	23.2122	-2.10042
			C3	0.602698	12.2579	-9.53202
			C3	35.391	14.8473	-2.09385
			C3	-3.94353	2.9887	14.6333
			C3	-3.24521	15.8337	-2.71104
			C3	-27.0636	-19.7456	9.22708
			C3	-4.30505	2.06597	-21.7318
			C3	-31.0955	-4.78246	-21.7256
			C3	-30.6326	4.17979	-15.8753
			C3	-19.2724	6.19051	9.1871
			C3	-19.6581	-28.6617	-15.8917
			C3	0.725771	-4.14306	15.786
			C3	12.0568	-6.11435	-9.16835
			C3	19.6514	24.525	21.7266
			C3	30.6855	13.5285	-9.18436
			C3	11.7303	28.651	15.8145
			C3	0.456097	4.78161	21.7677
			C3	31.0953	22.0759	-2.7324
			C3	19.3895	-10.6581	-2.74022
			C3	34.6198	2.67327	15.8673
			C3	4.28794	19.8083	-9.16757
			C3	27.0012	-2.05683	21.7573
			C3	-11.7129	-24.5692	-21.7322
			C3	-12.0502	10.7033	2.71304
			C3	-0.460134	-22.1296	2.74772
			C3	-0.724741	-13.6003	9.18658
			C3	-34.6691	-15.8856	2.73505
			C3	3.25403	-2.72451	-15.8433
			C3	3.22157	-15.782	2.71123
			C3	27.0714	19.7502	-9.22606
			C3	4.36807	-2.02467	21.7555
			C3	31.0649	4.75755	21.733
			C3	30.6781	-4.17136	15.8482
			C3	19.3443	-6.1735	-9.16185
			C3	19.6574	28.6665	15.9161
			C3	-0.722368	4.14347	-15.7872
			C3	-12.0793	6.13421	9.19094
			C3	-19.6418	-24.5403	-21.7143
			C3	-30.64	-13.567	9.22317
			C3	-11.7235	-28.6479	-15.8197
			C3	-0.409258	-4.75691	-21.7612
			C3	-31.0537	-22.098	2.73072
			C3	-19.3311	10.71	2.76844
			C3	-34.6586	-2.70282	-15.84
			C3	-4.35649	-19.8514	9.14033
			C3	-27.076	2.11241	-21.7033
			C3	11.736	24.4729	21.7334
			C3	12.1297	-10.7465	-2.74102
			C3	0.398143	22.0968	-2.76902
			C3	0.725773	13.5968	-9.18732
			C3	34.6607	15.8342	-2.73856
			C3	-3.23666	2.69998	15.7918
			C3	-4.033	13.0043	5.86248
			C3	-18.4106	-18.1494	11.4799
			C3	-12.9544	4.70165	-20.816
			C3	-28.9757	-13.5849	-20.8397
			C3	-24.9117	8.5403	-10.3006
			C3	-22.1137	-2.19385	11.3626
			C3	-26.2488	-25.7287	-10.309
			C3	6.54358	-8.52848	10.2611
			C3	9.19677	2.23125	-11.4885
			C3	26.2442	18.2928	20.8164
			C3	24.899	6.86115	-11.4616
			C3	5.15054	25.7323	10.3305
			C3	2.41639	13.5777	20.808
			C3	28.983	24.1687	5.85991
			C3	22.1202	-9.98044	5.85874
			C3	35.4134	9.86615	10.307
			C3	13.0048	18.1271	-11.4926
			C3	18.4774	-4.73698	20.9711
			C3	-5.07011	-18.3198	-20.9675
			C3	-9.26429	9.9661	-5.89482
			C3	-2.41418	-24.1563	-5.86058
			C3	-6.51508	-6.85497	11.4822
			C3	-35.5354	-13.0004	-5.90171
			C3	4.14896	-9.91689	-10.2961
			C3	3.9946	-13.0034	-5.89576
			C3	18.4502	18.0885	-11.382
			C3	13.0222	-4.79741	20.9211
			C3	28.9947	13.6589	20.9102
			C3	24.8939	-8.52194	10.2844
			C3	22.1168	2.19101	-11.3616
			C3	26.3258	25.8178	10.2904
			C3	-6.54235	8.53154	-10.2631
			C3	-9.24555	-2.20309	11.3777
			C3	-26.327	-18.3027	-20.913
			C3	-24.918	-6.86949	11.485
			C3	-5.04773	-25.832	-10.292
			C3	-2.41746	-13.5641	-20.8127
			C3	-28.9981	-24.2677	-5.90493
			C3	-22.1106	9.97939	-5.85019
			C3	-35.4114	-9.86985	-10.3051
			C3	-12.9608	-18.0488	11.3667
			C3	-18.402	4.78758	-20.9363
			C3	5.04331	18.3198	20.9244
			C3	9.24726	-9.9968	5.86639
			C3	2.35183	24.2804	5.90895
			C3	6.5305	6.90164	-11.3686
			C3	35.5058	12.9775	5.90437
			C3	-4.13676	9.92403	10.285
			C3	-4.0124	12.3892	4.60993
			C3	-19.0884	-19.1061	10.7209
			C3	-12.2743	3.68918	-21.4974
			C3	-28.4374	-12.4938	-21.5252
			C3	-26.0768	7.78707	-10.1536
			C3	-22.6187	-1.11477	10.6322
			C3	-25.0232	-26.3816	-10.1481
			C3	5.38809	-7.76411	10.0981
			C3	8.69646	1.18217	-10.7167
			C3	25.0181	18.3597	21.4851
			C3	26.0655	6.96376	-10.7016
			C3	6.36142	26.4049	10.1623
			C3	2.96243	12.4889	21.4914
			C3	28.4401	24.4454	4.60275
			C3	22.6393	-9.65374	4.60298
			C3	35.3725	8.47867	10.1463
			C3	12.3177	19.0628	-10.7146
			C3	19.1127	-3.70646	21.6685
			C3	-6.28502	-18.3666	-21.6548
			C3	-8.72997	9.6237	-4.65105
			C3	-2.9567	-24.4395	-4.60411
			C3	-5.3584	-6.96018	10.7086
			C3	-35.459	-12.4014	-4.6427
			C3	4.0758	-8.53294	-10.1319
			C3	3.95657	-12.3733	-4.65014
			C3	19.123	19.0812	-10.6645
			C3	12.3472	-3.75327	21.5564
			C3	28.4318	12.5472	21.5422
			C3	26.0589	-7.76908	10.1278
			C3	22.6253	1.11313	-10.6318
			C3	25.0918	26.4543	10.1481
			C3	-5.3871	7.76645	-10.0993
			C3	-8.72509	-1.13064	10.652
			C3	-25.0927	-18.3783	-21.56
			C3	-26.085	-6.97922	10.7268
			C3	-6.28685	-26.4536	-10.1328
			C3	-2.95666	-12.4698	-21.4942
			C3	-28.4341	-24.4934	-4.64771
			C3	-22.62	9.65105	-4.59046
			C3	-35.3696	-8.48148	-10.1424
			C3	-12.2904	-19.035	10.6391
			C3	-19.0797	3.7518	-21.5821
			C3	6.27982	18.3718	21.5675
			C3	8.72672	-9.67217	4.61301
			C3	2.91482	24.4955	4.64835
			C3	5.35093	7.00681	-10.6293
			C3	35.4197	12.3775	4.64601
			C3	-4.05994	8.54151	10.1155
			C3	-6.12734	14.0945	5.29258
			C3	-19.5387	-18.9292	13.4867
			C3	-11.9398	6.35807	-22.2768
			C3	-30.949	-13.488	-22.2547
			C3	-26.1524	10.2381	-11.521
			C3	-22.3239	-0.89852	13.409
			C3	-27.1245	-27.6661	-11.4809
			C3	5.28128	-10.1852	11.5106
			C3	9.10435	0.834503	-13.4714
			C3	27.1162	20.0514	22.2442
			C3	26.1436	7.46356	-13.4634
			C3	4.26108	27.6446	11.5352
			C3	0.476901	13.5154	22.2691
			C3	30.9487	25.4786	5.2902
			C3	22.3183	-12.3428	5.31895
			C3	37.5262	9.66424	11.4859
			C3	11.9046	18.961	-13.4896
			C3	19.5867	-6.37099	22.3741
			C3	-4.21512	-20.1246	-22.3502
			C3	-9.1714	12.3146	-5.28802
			C3	-0.466471	-25.5073	-5.32032
			C3	-5.25784	-7.46882	13.4664
			C3	-37.6268	-14.065	-5.26584
			C3	6.22326	-9.6745	-11.5357
			C3	6.07589	-14.0926	-5.28573
			C3	19.5195	18.8491	-13.4246
			C3	11.9116	-6.40696	22.3582
			C3	30.9603	13.4633	22.3203
			C3	26.1389	-10.2052	11.5189
			C3	22.3237	0.894788	-13.4072
			C3	27.1754	27.7472	11.503
			C3	-5.27918	10.1871	-11.5111
			C3	-9.14158	-0.877133	13.4091
			C3	-27.1718	-20.0933	-22.3251
			C3	-26.1583	-7.45481	13.4932
			C3	-4.22932	-27.7588	-11.5248
			C3	-0.474814	-13.5089	-22.2733
			C3	-30.9639	-25.5349	-5.24996
			C3	-22.3227	12.3393	-5.30869
			C3	-37.5226	-9.66503	-11.4844
			C3	-11.9373	-18.8733	13.412
			C3	-19.5326	6.41844	-22.3409
			C3	4.22174	20.1268	22.3252
			C3	9.14493	-12.355	5.295
			C3	0.411817	25.598	5.27969
			C3	5.31227	7.46193	-13.3907
			C3	37.5859	14.0435	5.25293
			C3	-6.20433	9.67077	11.5295
			C3	-6.11201	13.4813	4.05271
			C3	-20.2083	-19.8791	12.736
			C3	-11.2674	5.35459	-22.9536
			C3	-30.4181	-12.4062	-22.9328
			C3	-27.31	9.49495	-11.373
			C3	-22.8253	0.170538	12.6869
			C3	-25.9086	-28.3099	-11.327
			C3	4.13427	-9.43113	11.3448
			C3	8.60617	-0.206353	-12.7071
			C3	25.9004	20.121	22.9034
			C3	27.2995	7.56522	-12.7123
			C3	5.45863	28.3155	11.364
			C3	1.01652	12.436	22.946
			C3	30.4126	25.7513	4.04437
			C3	22.8312	-12.0181	4.07611
			C3	37.4831	8.28925	11.3325
			C3	11.2274	19.8937	-12.7208
			C3	20.2089	-5.344	23.0798
			C3	-5.42061	-20.1765	-23.0278
			C3	-8.64174	11.9749	-4.05766
			C3	-1.00402	-25.7859	-4.07622
			C3	-4.10863	-7.5759	12.6995
			C3	-37.5495	-13.4725	-4.01882
			C3	6.15318	-8.30157	-11.3734
			C3	6.0371	-13.4695	-4.05224
			C3	20.1773	19.8397	-12.7161
			C3	11.2422	-5.37108	22.9886
			C3	30.4044	12.361	22.9451
			C3	27.2949	-9.46153	11.3635
			C3	22.8296	-0.172617	-12.6852
			C3	25.9537	28.3777	11.3607
			C3	-4.1324	9.43211	-11.3451
			C3	-8.61973	0.184082	12.6919
			C3	-25.9494	-20.1684	-22.9661
			C3	-27.315	-7.56048	12.7436
			C3	-5.45748	-28.3751	-11.37
			C3	-1.00863	-12.4257	-22.9499
			C3	-30.4075	-25.757	-4.00306
			C3	-22.8295	12.0138	-4.06201
			C3	-37.4786	-8.28934	-11.3299
			C3	-11.2741	-19.8501	12.6906
			C3	-20.2029	5.39314	-22.9838
			C3	5.4478	20.1807	22.9654
			C3	8.62155	-12.0342	4.05499
			C3	0.971335	25.8164	4.0314
			C3	4.14142	7.56584	-12.6595
			C3	37.5003	13.4516	4.00574
			C3	-6.12981	8.29886	11.3604
			C3	-8.84716	19.1865	12.1103
			C3	-17.0078	-13.8441	20.3352
			C3	-14.5092	14.5701	-19.7975
			C3	-36.7944	-19.7973	-19.893
			C3	-20.5087	16.5877	-14.1135
			C3	-19.2274	-5.64198	20.2976
			C3	-35.5792	-26.0019	-14.0561
			C3	10.9539	-16.5987	14.1023
			C3	12.1801	5.58761	-20.3391
			C3	35.5424	21.9728	19.8725
			C3	20.485	7.81754	-20.3258
			C3	-4.16521	26.0726	14.13
			C3	-5.31664	19.8734	19.7967
			C3	36.8211	25.3777	12.0672
			C3	19.25	-17.2444	12.1476
			C3	40.3234	17.8174	14.0544
			C3	14.5387	13.8848	-20.3417
			C3	17.0147	-14.6288	19.8633
			C3	4.14799	-21.9477	-19.8042
			C3	-12.1925	17.2482	-12.1077
			C3	5.36638	-25.2478	-12.0866
			C3	-10.9248	-7.74861	20.3398
			C3	-40.3936	-19.1887	-12.1025
			C3	8.88418	-17.7992	-14.0926
			C3	8.86428	-19.1995	-12.1043
			C3	16.9775	13.859	-20.4033
			C3	14.5798	-14.5958	19.8257
			C3	36.7634	19.8642	19.8382
			C3	20.4979	-16.5787	14.1306
			C3	19.2446	5.71978	-20.3033
			C3	35.6088	26.0673	14.0575
			C3	-10.9536	16.6005	-14.0976
			C3	-12.1923	-5.67329	20.3065
			C3	-35.5745	-21.9076	-19.8597
			C3	-20.4187	-7.76581	20.3434
			C3	4.22102	-25.9634	-14.1084
			C3	5.34071	-19.8229	-19.7807
			C3	-36.7915	-25.3341	-12.0539
			C3	-19.2479	17.2507	-12.136
			C3	-40.3933	-17.7848	-14.0889
			C3	-14.57	-13.8134	20.3074
			C3	-16.9465	14.5997	-19.7856
			C3	-4.10517	21.9903	19.8438
			C3	12.1898	-17.2457	12.1112
			C3	-5.32857	25.3663	12.1065
			C3	11.0115	7.72043	-20.306
			C3	40.3522	19.1944	12.0508
			C3	-8.90587	17.7615	14.0808
			C3	-9.20387	20.274	12.8922
			C3	-17.0164	-12.9675	21.4109
			C3	-14.4969	15.8814	-19.3453
			C3	-37.9193	-20.4373	-19.3918
			C3	-19.743	17.4411	-14.8959
			C3	-18.4688	-6.04122	21.3857
			C3	-36.7168	-25.7748	-14.814
			C3	11.7288	-17.4634	14.8674
			C3	12.9588	6.02522	-21.4005
			C3	36.6602	22.6344	19.3799
			C3	19.7363	8.25974	-21.4084
			C3	-5.30279	25.7962	14.8757
			C3	-6.43748	20.5372	19.3324
			C3	37.947	25.1159	12.8384
			C3	18.5031	-18.114	12.9209
			C3	40.6788	18.9239	14.8102
			C3	14.5036	12.9901	-21.3975
			C3	17.0069	-15.9344	19.3867
			C3	5.28661	-22.5928	-19.3512
			C3	-12.9519	18.1254	-12.8662
			C3	6.52677	-25.032	-12.8174
			C3	-11.6944	-8.20801	21.3988
			C3	-40.7041	-20.2942	-12.8852
			C3	9.25158	-18.8953	-14.8619
			C3	9.25071	-20.2892	-12.8713
			C3	16.9384	12.953	-21.4554
			C3	14.5722	-15.9024	19.3661
			C3	37.8794	20.5256	19.3526
			C3	19.742	-17.4455	14.9088
			C3	18.5009	6.15877	-21.3843
			C3	36.7307	25.7959	14.8304
			C3	-11.7292	17.4634	-14.8616
			C3	-12.9544	-6.12626	21.3726
			C3	-36.6968	-22.5432	-19.3576
			C3	-19.6509	-8.16899	21.4255
			C3	5.3832	-25.7607	-14.8384
			C3	6.48255	-20.4709	-19.3362
			C3	-37.9269	-25.0943	-12.8158
			C3	-18.4927	18.1112	-12.9139
			C3	-40.7052	-18.8917	-14.8711
			C3	-14.5776	-12.9457	21.3844
			C3	-16.9326	15.9086	-19.3316
			C3	-5.2258	22.6534	19.3643
			C3	12.9508	-18.12	12.8703
			C3	-6.46667	25.1033	12.8501
			C3	11.7824	8.15487	-21.372
			C3	40.6972	20.3052	12.8109
			C3	-9.25439	18.8507	14.8651
			C3	-33.0325	-29.9859	-8.13169
			C3	26.3856	-15.6596	10.114
			C3	5.03547	4.35331	-18.1319
			C3	25.1626	2.20298	-18.1216
			C3	-0.360028	19.7635	25.5575
			C3	-11.0222	12.2054	10.135
			C3	14.5308	-10.187	25.569
			C3	-31.7722	-19.7	-25.593
			C3	-42.4829	-12.1976	-10.131
			C3	-14.5037	-20.712	18.1173
			C3	0.376298	-30.6766	-10.0728
			C3	-16.9531	10.2078	-25.5217
			C3	-6.22056	-2.21152	18.1229
			C3	-25.1937	16.3491	-8.11514
			C3	11.055	-13.5649	-8.12704
			C3	1.54174	-17.6697	-25.5713
			C3	-5.03637	15.6572	-10.0565
			C3	-26.3865	-4.31943	18.1376
			C3	16.9682	20.689	-18.1319
			C3	42.459	13.6212	8.09527
			C3	6.30137	-16.362	8.106
			C3	31.8156	30.6917	10.1156
			C3	-1.56113	29.9908	8.13228
			C3	33.0279	17.6232	25.5428
			C3	33.0335	29.9825	8.12531
			C3	-26.3761	15.6561	-10.1298
			C3	-5.03798	-4.33892	18.1301
			C3	-25.1974	-2.1952	18.1177
			C3	0.356836	-19.7958	-25.5248
			C3	11.0216	-12.1934	-10.1361
			C3	-14.5177	10.176	-25.5741
			C3	31.775	19.705	25.5876
			C3	42.4791	12.1713	10.046
			C3	14.5318	20.7168	-18.1185
			C3	-0.354082	30.6996	10.1265
			C3	16.969	-10.2029	25.5449
			C3	6.20653	2.22193	-18.1118
			C3	25.1708	-16.3513	8.11896
			C3	-11.03	13.5928	8.1296
			C3	-1.56082	17.6457	25.5629
			C3	5.03001	-15.6605	10.0561
			C3	26.3903	4.30618	-18.1354
			C3	-16.9405	-20.6733	18.1341
			C3	-42.4807	-13.6077	-8.14321
			C3	-6.30961	16.3607	-8.10694
			C3	-31.818	-30.6981	-10.121
			C3	1.60054	-29.9546	-8.09528
			C3	-33.024	-17.6154	-25.5522
			C3	-1.66846	23.1195	-7.69462
			C3	-35.3149	-16.2897	9.6352
			C3	3.88422	3.71812	-18.5805
			C3	-36.5434	1.5369	-18.5632
			C3	-31.7691	1.61904	-24.3642
			C3	-12.1463	11.5329	9.67881
			C3	-16.8737	-28.2867	-24.3532
			C3	-0.353798	-1.52975	24.329
			C3	19.196	-11.5794	-9.69121
			C3	16.898	32.3962	18.5622
			C3	31.7748	22.4474	-9.5811
			C3	14.4337	28.3109	24.4021
			C3	-5.06448	-1.57442	18.5575
			C3	36.4964	16.9762	-7.65937
			C3	12.1632	-12.86	-7.67242
			C3	32.9201	0.460727	24.3512
			C3	-3.91316	16.2918	-9.54594
			C3	35.3085	-3.67333	18.5821
			C3	-14.4398	-32.4215	-18.5802
			C3	-19.2517	12.9791	7.60479
			C3	5.17669	-16.9962	7.59544
			C3	0.451015	-22.4141	9.67817
			C3	-32.9581	-23.1277	7.6572
			C3	1.61329	-0.545034	-24.3775
			C3	1.66722	-23.1226	7.68872
			C3	35.3177	16.2923	-9.67743
			C3	-3.88968	-3.70241	18.5808
			C3	36.498	-1.55039	18.5609
			C3	31.7361	-1.66563	24.3984
			C3	12.1335	-11.4967	-9.68521
			C3	16.8684	28.2796	24.3497
			C3	0.352506	1.53024	-24.3341
			C3	-19.2406	11.5209	9.54784
			C3	-16.8731	-32.3863	-18.555
			C3	-31.7592	-22.4188	9.65311
			C3	-14.4365	-28.3077	-24.3799
			C3	5.05241	1.58664	-18.5504
			C3	-36.5293	-16.984	7.64373
			C3	-12.145	12.9101	7.67031
			C3	-32.9658	-0.499976	-24.3584
			C3	3.90604	-16.2939	9.54527
			C3	-35.3147	3.63615	-18.5716
			C3	14.4637	32.4367	18.5849
			C3	19.2009	-12.9844	-7.70103
			C3	-5.18567	16.9955	-7.59606
			C3	-0.458168	22.4072	-9.68512
			C3	33.0116	23.1665	-7.61167
			C3	-1.61508	0.54737	24.3685
			C3	-2.85544	19.0012	10.1617
			C3	-18.3977	-11.3907	14.5925
			C3	-13.0333	10.0012	-15.6683
			C3	-33.6011	-16.3076	-15.6577
			C3	-19.0766	10.3492	-14.4987
			C3	-16.4122	-5.55999	14.6471
			C3	-30.9406	-21.7382	-14.5173
			C3	12.3628	-10.425	14.5272
			C3	15.0398	5.5884	-14.657
			C3	30.9414	20.9396	15.6597
			C3	19.0565	10.2693	-14.5735
			C3	0.610853	21.7455	14.4594
			C3	-2.14176	16.2942	15.6564
			C3	33.6047	20.2113	10.1738
			C3	16.4142	-11.9586	10.1235
			C3	34.3073	15.9215	14.5142
			C3	13.0434	11.4151	-14.6837
			C3	18.3928	-9.91314	15.6887
			C3	-0.577826	-20.9098	-15.6143
			C3	-15.0316	11.9522	-10.1355
			C3	2.15243	-20.1905	-10.1291
			C3	-12.3528	-10.2196	14.6591
			C3	-34.3149	-19.0082	-10.2287
			C3	2.84036	-15.8974	-14.5193
			C3	2.83906	-18.9899	-10.1369
			C3	18.3916	11.4826	-14.5814
			C3	13.0469	-10.019	15.6588
			C3	33.6139	16.3251	15.6407
			C3	19.0569	-10.3071	14.5408
			C3	16.4232	5.57114	-14.6535
			C3	30.948	21.738	14.5296
			C3	-12.3541	10.4073	-14.5334
			C3	-15.0289	-5.57139	14.6473
			C3	-30.9464	-20.9401	-15.6477
			C3	-19.1045	-10.2028	14.5927
			C3	-0.590833	-21.722	-14.4945
			C3	2.14282	-16.2883	-15.6498
			C3	-33.6189	-20.2037	-10.231
			C3	-16.4153	11.9482	-10.1233
			C3	-34.2938	-15.9063	-14.5286
			C3	-13.0373	-11.423	14.6509
			C3	-18.3947	9.95283	-15.6324
			C3	0.603444	20.9181	15.5693
			C3	15.0305	-11.9599	10.1354
			C3	-2.17037	20.2023	10.1618
			C3	12.3558	10.2161	-14.6781
			C3	34.2939	19.0127	10.1773
			C3	-2.83776	15.9041	14.5254
			C3	-4.82446	20.1255	9.29068
			C3	-19.7066	-12.1801	16.4769
			C3	-11.6823	11.5002	-17.019
			C3	-35.5558	-15.8565	-17.0211
			C3	-20.4052	11.8865	-15.8277
			C3	-16.4062	-4.02001	16.5254
			C3	-31.4964	-23.671	-15.8763
			C3	10.9846	-11.893	15.8813
			C3	15.0185	4.02374	-16.514
			C3	31.4976	22.8689	17.0246
			C3	20.3813	10.9747	-16.4837
			C3	-0.100837	23.6143	15.84
			C3	-4.1071	15.8684	17.0179
			C3	35.5545	21.3339	9.26607
			C3	16.4135	-14.2429	9.29571
			C3	36.2543	15.4456	15.8829
			C3	11.6747	12.2053	-16.5239
			C3	19.7006	-11.4939	16.9939
			C3	0.0903355	-22.7988	-16.9834
			C3	-15.0232	14.2365	-9.30501
			C3	4.13369	-21.3269	-9.30069
			C3	-10.9894	-11.0009	16.5074
			C3	-36.242	-20.1241	-9.26473
			C3	4.80619	-15.4658	-15.8732
			C3	4.82486	-20.1172	-9.30312
			C3	19.701	12.1934	-16.5009
			C3	11.6775	-11.4848	17.0213
			C3	35.551	15.8487	17.0181
			C3	20.3783	-11.8803	15.8372
			C3	16.4133	4.01237	-16.5151
			C3	31.4992	23.6732	15.8835
			C3	-10.9923	11.9038	-15.8763
			C3	-15.0127	-4.02627	16.5225
			C3	-31.4977	-22.8653	-17.0169
			C3	-20.4196	-10.9805	16.4783
			C3	0.0759903	-23.6181	-15.8526
			C3	4.10556	-15.8643	-17.0116
			C3	-35.5395	-21.3309	-9.26644
			C3	-16.4163	14.2335	-9.29797
			C3	-36.2538	-15.4531	-15.8832
			C3	-11.6831	-12.2116	16.5035
			C3	-19.7159	11.4842	-16.9735
			C3	-0.0985538	22.7806	16.9606
			C3	15.0203	-14.2422	9.30309
			C3	-4.13095	21.3348	9.29019
			C3	10.9804	10.9966	-16.5216
			C3	36.2484	20.1238	9.26561
			C3	-4.80583	15.4702	15.8791
			C3	47.8726	23.5165	15.1209
			C3	-43.6116	-23.7621	-21.8144
			C3	-42.3739	-29.1686	-17.1384
			C3	43.0561	30.3777	17.1355
			C3	44.2983	24.1676	22.9329
			C3	42.3965	25.8941	21.8079
			C3	43.5851	28.4702	15.1404
			C3	46.4834	22.1522	17.1394
			C3	-44.2945	-29.6517	-15.1387
			C3	-43.0786	-26.282	-22.9309
			C3	-46.4602	-23.5011	-15.1566
			C3	-47.801	-22.0388	-17.1476
			C3	-47.8423	-23.4594	-15.1576
			C3	43.6086	23.7725	21.8012
			C3	42.3617	29.1839	17.1392
			C3	-43.0713	-30.361	-17.1393
			C3	-44.3011	-24.1654	-22.946
			C3	-42.3862	-25.8773	-21.806
			C3	-43.5973	-28.4588	-15.1398
			C3	-46.4212	-22.0855	-17.1505
			C3	44.2736	29.6673	15.131
			C3	43.0812	26.2839	22.9481
			C3	46.4863	23.5489	15.1445
			C3	47.8652	22.1205	17.1196
			C3	-48.3824	-31.1969	-22.9078
			C3	-45.9327	-32.0097	-21.7942
			C3	-45.9343	-31.2221	-22.9304
			C3	-48.3818	-31.9939	-21.7781
			C3	-51.1899	-30.3475	-17.1221
			C3	-50.6578	-28.4445	-15.1199
			C3	-51.8623	-29.1414	-17.1328
			C3	-49.988	-29.6533	-15.1068
			C3	-49.9633	-24.182	-22.9773
			C3	-51.864	-25.8845	-21.7984
			C3	-51.202	-26.2877	-22.9414
			C3	-50.6326	-23.7761	-21.8348
			C3	51.2062	26.3217	22.8927
			C3	50.7203	23.7939	21.7818
			C3	50.0202	24.1935	22.9167
			C3	51.9041	25.9255	21.7633
			C3	51.9355	29.1463	17.1561
			C3	50.0316	29.5942	15.1384
			C3	51.2164	30.3316	17.1435
			C3	50.7435	28.4045	15.1647
			C3	45.9338	31.1917	22.9629
			C3	48.3645	31.9832	21.7971
			C3	48.3749	31.2042	22.9397
			C3	45.9242	31.9791	21.8213
			Cr1	-8.83398	2.83555	-25.6629
			Cr1	31.4054	7.94352	-11.2278
			Cr1	8.81793	31.1593	11.2249
			Cr1	-29.4634	-9.06073	-25.6601
			Cr1	38.2936	3.97138	11.2294
			Cr1	8.83094	23.2506	-11.2266
			Cr1	-8.73484	-21.1678	-25.6447
			Cr1	-6.88139	11.8951	-0.011251
			Cr1	29.4643	27.2116	-0.00780635
			Cr1	0.0203689	-7.93888	11.2148
			Cr1	24.5389	-11.9098	0.00898405
			Cr1	6.87462	-3.96607	-11.2157
			Cr1	-22.5816	-20.9848	-25.6591
			Cr1	31.4014	-7.94452	11.2267
			Cr1	22.5987	23.2525	-11.2258
			Cr1	-1.96311	-9.07265	-25.6629
			Cr1	24.5525	-3.97526	-11.2271
			Cr1	22.5786	31.1895	11.2327
			Cr1	-22.5956	2.83722	-25.6707
			Cr1	6.86139	-11.9068	-0.00953245
			Cr1	-29.4608	-27.2038	-0.00765675
			Cr1	-0.0204704	7.9375	-11.2144
			Cr1	38.2887	11.9105	0.00587925
			Cr1	-6.86543	3.9717	11.2215
			Cr1	15.7098	25.4956	18.0262
			Cr1	15.7111	-7.36751	-5.20377
			Cr1	-15.704	7.36985	5.20887
			Cr1	-15.7097	-25.4951	-18.0265
			Cr1	1.46449	0.845121	18.0477
			Cr1	29.9552	17.2939	-5.21801
			Cr1	1.47665	17.2852	-5.20176
			Cr1	29.9275	0.857305	18.0261
			Cr1	-1.4785	-17.2895	5.2061
			Cr1	-1.46353	-0.845255	-18.0431
			Cr1	-29.9513	-17.2953	5.21331
			Cr1	-29.951	-0.849911	-18.0421
			Cr1	-4.28383	14.6665	10.3673
			Cr1	-15.7063	-15.02	13.8564
			Cr1	-15.7082	8.06264	-18.7817
			Cr1	35.7046	14.6664	10.3745
			Cr1	15.7075	15.0213	-13.8655
			Cr1	15.7146	-8.06426	18.7924
			Cr1	-35.7062	-14.6671	-10.375
			Cr1	4.28315	-14.6635	-10.3614
			Cr1	-30.5585	-17.6404	-18.7797
			Cr1	-20.8681	11.0276	-10.3617
			Cr1	-20.8644	-6.08881	13.8626
			Cr1	-30.5516	-23.5883	-10.3719
			Cr1	10.5615	-11.0448	10.3679
			Cr1	10.5535	6.09902	-13.8673
			Cr1	30.5549	17.6445	18.7808
			Cr1	20.8585	6.09311	-13.8601
			Cr1	0.869963	23.5875	10.3655
			Cr1	0.87847	17.6258	18.7771
			Cr1	30.5564	23.5882	10.3691
			Cr1	20.8569	-11.0358	10.3634
			Cr1	-0.8766	-17.6282	-18.7777
			Cr1	-10.5626	11.0462	-10.3636
			Cr1	-0.87114	-23.5895	-10.3665
			Cr1	-10.5575	-6.0902	13.8659
			Cr1	-40.0924	-25.2487	-17.8461
			Cr1	8.77937	-25.2133	-17.8651
			Cr1	-15.7223	21.1745	-14.8796
			Cr1	-13.9074	-10.136	24.9373
			Cr1	15.7261	6.98174	-24.9204
			Cr1	15.7144	-21.1657	14.8652
			Cr1	-10.4646	22.094	17.8575
			Cr1	41.9107	22.1016	17.8515
			Cr2	-4.20845	9.94765	0.388123
			Cr2	-21.1774	-22.8008	8.24641
			Cr2	-10.2281	0.183902	-24.2355
			Cr2	-26.4564	-8.94331	-24.2352
			Cr2	-30.3167	5.47525	-9.33443
			Cr2	-24.845	2.54005	8.25098
			Cr2	-20.9636	-28.9969	-9.30957
			Cr2	1.09129	-5.47214	9.24875
			Cr2	6.50969	-2.4905	-8.24588
			Cr2	20.9593	18.4386	24.2392
			Cr2	30.3209	6.9363	-8.24877
			Cr2	10.4076	29.0152	9.25085
			Cr2	4.99408	8.98264	24.2594
			Cr2	26.4558	25.8298	0.353354
			Cr2	24.9101	-8.61515	0.400585
			Cr2	35.5965	3.65583	9.30322
			Cr2	10.2292	22.7902	-8.2468
			Cr2	21.0189	0.109714	23.59
			Cr2	-10.4426	-18.468	-24.0732
			Cr2	-6.50962	8.60648	-0.396951
			Cr2	-4.99137	-25.8829	-0.396593
			Cr2	-1.08117	-6.9495	8.23384
			Cr2	-35.5979	-9.99086	-0.357495
			Cr2	4.1957	-3.67606	-9.26209
			Cr2	4.19035	-9.94583	-0.388854
			Cr2	21.1689	22.8068	-8.25165
			Cr2	10.2867	-0.175733	24.2665
			Cr2	26.4467	8.93163	24.2372
			Cr2	30.3294	-5.46937	9.29688
			Cr2	24.8682	-2.5359	-8.24565
			Cr2	20.9723	28.994	9.31197
			Cr2	-1.09056	5.47748	-9.24545
			Cr2	-6.53512	2.52429	8.24237
			Cr2	-20.9671	-18.4379	-24.2367
			Cr2	-30.3148	-6.97038	8.26084
			Cr2	-10.412	-29.0127	-9.25762
			Cr2	-4.97146	-8.95601	-24.2463
			Cr2	-26.4483	-25.83	-0.348811
			Cr2	-24.8518	8.61932	-0.356609
			Cr2	-35.5929	-3.65662	-9.29583
			Cr2	-10.2664	-22.7969	8.24633
			Cr2	-21.1992	0.204405	-24.2245
			Cr2	10.4317	18.4257	24.2387
			Cr2	6.55222	-8.61524	0.35821
			Cr2	4.96135	25.8377	0.360935
			Cr2	1.07881	6.94855	-8.23442
			Cr2	35.5935	9.98224	0.349243
			Cr2	-4.19968	3.68668	9.23943
			Cr2	1.35698	-18.9345	5.58023
			Cr2	-0.193885	1.64771	-19.6884
			Cr2	-15.6746	8.90087	7.99238
			Cr2	-17.0766	-27.8466	-19.6925
			Cr2	-31.2238	-18.0189	8.12877
			Cr2	-14.1248	-27.8718	-19.7085
			Cr2	1.34878	-1.01558	-19.7002
			Cr2	-32.7604	-18.9207	5.61042
			Cr2	-15.6856	10.6477	5.59237
			Cr2	-32.767	-1.02218	-19.7019
			Cr2	-0.164437	-18.0866	8.00647
			Cr2	-31.2328	1.64573	-19.6959
			Cr2	15.7113	-8.8141	-8.1738
			Cr2	17.0716	27.8479	19.6968
			Cr2	14.1217	27.8761	19.7076
			Cr2	15.7386	-10.5131	-5.71732
			Cr2	-1.36856	18.9292	-5.58716
			Cr2	0.213366	-1.6621	19.6976
			Cr2	31.2392	18.0255	-8.12231
			Cr2	-1.34755	1.02187	19.7007
			Cr2	32.7796	18.9071	-5.61235
			Cr2	32.6547	0.877797	19.6964
			Cr2	0.120626	18.0543	-7.98235
			Cr2	31.1812	-1.69489	19.7187
			Cr2	-7.07896	15.871	9.38765
			Cr2	-17.1962	-16.293	16.4391
			Cr2	-14.2475	10.0485	-20.861
			Cr2	-32.9928	-17.3216	-20.8452
			Cr2	-22.7088	13.2607	-11.8324
			Cr2	-21.244	-4.16644	16.4139
			Cr2	-31.5074	-26.295	-11.817
			Cr2	8.6957	-13.2365	11.8457
			Cr2	10.2037	4.16004	-16.4385
			Cr2	31.4963	19.9095	20.8478
			Cr2	22.7033	6.75979	-16.4235
			Cr2	-0.118222	26.306	11.8214
			Cr2	-1.57096	17.3469	20.8547
			Cr2	32.9973	25.4339	9.39211
			Cr2	21.2417	-14.0826	9.39994
			Cr2	38.5299	14.1391	11.8149
			Cr2	14.2583	16.3118	-16.4611
			Cr2	17.1873	-10.0689	20.8661
			Cr2	0.129876	-19.9253	-20.8447
			Cr2	-10.2115	14.069	-9.39024
			Cr2	1.5824	-25.4388	-9.40933
			Cr2	-8.69993	-6.75262	16.4371
			Cr2	-38.5564	-15.881	-9.42199
			Cr2	7.12848	-14.1682	-11.8455
			Cr2	7.08155	-15.8712	-9.38925
			Cr2	17.1858	16.3109	-16.4389
			Cr2	14.2615	-10.0939	20.8668
			Cr2	33.0233	17.3374	20.8428
			Cr2	22.7025	-13.2369	11.8493
			Cr2	21.2453	4.17148	-16.4168
			Cr2	31.5364	26.3078	11.8292
			Cr2	-8.69655	13.2378	-11.8517
			Cr2	-10.2028	-4.16191	16.3958
			Cr2	-31.5295	-19.9211	-20.8588
			Cr2	-22.7116	-6.73233	16.4499
			Cr2	0.141396	-26.2978	-11.8406
			Cr2	1.56671	-17.3382	-20.8521
			Cr2	-33.0134	-25.4466	-9.3934
			Cr2	-21.2442	14.0773	-9.39321
			Cr2	-38.5194	-14.1395	-11.8249
			Cr2	-14.2335	-16.3146	16.4135
			Cr2	-17.1947	10.084	-20.8425
			Cr2	-0.121823	19.9313	20.834
			Cr2	10.2085	-14.0724	9.39144
			Cr2	-1.60531	25.4721	9.44198
			Cr2	8.70549	6.75371	-16.3954
			Cr2	38.544	15.8729	9.39783
			Cr2	-7.11548	14.1585	11.8524
			Cr2	10.4807	-24.103	-15.2498
			Cr2	-14.2355	20.2451	-17.6929
			Cr2	-15.727	-7.38595	24.897
			Cr2	-17.1833	-9.9401	24.971
			Cr2	10.4022	-22.4389	-17.7172
			Cr2	-41.8376	-24.1604	-15.2871
			Cr2	-41.8378	-22.4663	-17.6962
			Cr2	-17.2028	20.2702	-17.6699
			Cr2	40.3746	25.0061	17.6877
			Cr2	-8.9039	24.9827	17.6671
			Cr2	-10.3257	24.1171	15.2618
			Cr2	14.2381	-20.2565	17.6969
			Cr2	17.1824	9.93223	-24.9752
			Cr2	41.8454	24.1834	15.2883
			Cr2	14.2551	9.93027	-24.8875
			Cr2	17.2102	-20.295	17.6698
			H1	46.3589	22.9346	26.1689
			H1	48.0263	32.2635	12.946
			H1	42.909	20.0362	18.0599
			H1	-43.0196	-28.6597	-26.212
			H1	-38.864	-26.0978	-19.61
			H1	-55.0781	-27.241	-18.1873
			H1	-48.0059	-32.2151	-12.9637
			H1	51.1445	20.159	18.3133
			H1	-2.1816	14.3678	11.2486
			H1	-16.461	7.29524	-16.7499
			H1	-29.3084	-17.9202	-16.8626
			H1	-19.7982	-7.57398	12.468
			H1	-30.1185	-21.3869	-9.81309
			H1	30.1797	16.4276	16.8604
			H1	1.32902	21.4054	9.75701
			H1	2.00517	17.865	16.7811
			H1	29.3176	21.8647	11.2748
			H1	19.7669	-9.2418	11.2712
			H1	33.5918	15.4466	9.86555
			H1	14.8253	-6.95555	16.9614
			H1	-11.3585	9.08083	-11.2531
			H1	-1.91233	-21.7669	-11.296
			H1	2.1824	-14.3641	-11.2517
			H1	14.8178	13.6107	-12.2659
			H1	19.7634	7.55978	-12.4835
			H1	-11.3616	-7.58329	12.3148
			H1	-2.04582	-17.8808	-16.8068
			H1	-19.8073	9.18804	-11.251
			H1	-33.5915	-15.4443	-9.86135
			H1	-16.4877	-13.4405	12.3655
			H1	11.3594	-9.08096	11.2504
			H1	12.2514	6.0464	-12.3173
			H1	-7.27228	14.0785	-0.570481
			H1	-24.1119	-22.0476	12.4364
			H1	-7.12569	4.24337	-25.0941
			H1	-31.5993	-8.42592	-25.0731
			H1	-31.1545	8.44563	-13.4394
			H1	-22.8205	4.93265	12.3808
			H1	31.6068	26.4524	-0.408259
			H1	7.13159	22.2355	-12.3681
			H1	-8.14752	-23.2196	-24.9163
			H1	0.0575764	-9.90685	12.3799
			H1	-38.733	-14.1414	0.418877
			H1	7.28251	-4.17683	-13.4637
			H1	24.1137	22.0466	-12.4355
			H1	23.0832	31.3659	13.4764
			H1	-8.56143	4.9787	12.3791
			H1	-23.0878	-23.1606	-25.0798
			H1	-31.1627	-9.86341	12.437
			H1	0.116242	-8.30181	-25.091
			H1	-22.8294	13.3235	0.527193
			H1	-24.117	4.3756	-24.9376
			H1	8.54956	-13.3535	-0.559917
			H1	-0.122285	26.4256	-0.535478
			H1	-0.0642768	9.90815	-12.3765
			H1	-28.8562	-16.7743	3.24018
			H1	-14.776	-23.7408	-16.8064
			H1	2.26841	2.38792	16.515
			H1	14.7749	23.776	16.7634
			H1	28.9617	16.5974	-3.2438
			H1	15.6932	-5.10217	-4.76772
			H1	2.4971	16.6844	-3.20453
			H1	27.8917	0.954253	16.9227
			H1	-2.27503	-2.38977	-16.51
			H1	-15.2557	6.21713	3.24324
			H1	-2.50123	-16.6945	3.21671
			H1	-28.8629	-2.53914	-16.8926
			H1	22.822	-4.94281	-12.3709
			H2	-9.32543	21.2638	12.4562
			H2	-17.9523	-12.6145	21.8412
			H2	-13.5592	16.3996	-19.1511
			H2	-38.8372	-19.888	-19.1916
			H2	-19.9091	17.5177	-15.9685
			H2	-17.6906	-5.39894	21.7934
			H2	-36.7205	-25.9351	-15.8909
			H2	11.5741	-17.5474	15.9424
			H2	13.7363	5.38837	-21.8214
			H2	36.6431	23.706	19.1823
			H2	19.9021	9.24587	-21.839
			H2	-5.31621	25.9344	15.9549
			H2	-7.35932	20.0016	19.1161
			H2	38.8565	24.7289	12.3803
			H2	17.7106	-18.7176	12.4854
			H2	40.7951	18.8443	15.889
			H2	13.5584	12.6205	-21.7889
			H2	17.9357	-16.4634	19.1817
			H2	5.29511	-23.6655	-19.1675
			H2	-13.7376	18.7257	-12.4094
			H2	7.42865	-24.6545	-12.3377
			H2	-11.5307	-9.20063	21.8173
			H2	-40.8227	-21.2807	-12.4388
			H2	9.38557	-18.7971	-15.9378
			H2	9.38791	-21.2695	-12.4184
			H2	17.8527	12.5596	-21.8953
			H2	13.6402	-16.4164	19.1426
			H2	38.8043	19.9915	19.1432
			H2	19.9049	-17.5211	15.9825
			H2	17.7152	5.54154	-21.8138
			H2	36.7111	25.9349	15.91
			H2	-11.5781	17.5468	-15.9367
			H2	-13.7563	-5.51996	21.7912
			H2	-36.6844	-23.6065	-19.13
			H2	-19.7774	-9.15472	21.869
			H2	5.41166	-25.9401	-15.9123
			H2	7.40206	-19.923	-19.1373
			H2	-38.8435	-24.7254	-12.3574
			H2	-17.6974	18.7143	-12.4807
			H2	-40.8278	-18.7936	-15.9489
			H2	-13.6521	-12.5693	21.8152
			H2	-17.8576	16.4465	-19.1354
			H2	-5.20395	23.7235	19.167
			H2	13.7355	-18.7222	12.4161
			H2	-7.36378	24.7028	12.3813
			H2	11.6554	9.15134	-21.7887
			H2	40.8272	21.2825	12.3474
			H2	-9.39719	18.7422	15.9397
			H2	-8.65958	19.3025	11.0454
			H2	-17.9401	-14.1974	19.8983
			H2	-13.5806	14.03	-19.9745
			H2	-36.798	-18.7258	-20.0874
			H2	-21.2837	15.9619	-14.5529
			H2	-19.0637	-4.67448	19.8285
			H2	-34.6548	-26.3321	-14.5249
			H2	10.1858	-15.9793	14.5617
			H2	12.3368	4.60476	-19.8988
			H2	34.615	22.5131	20.0561
			H2	21.2564	8.44782	-19.8854
			H2	-3.24577	26.422	14.6005
			H2	-5.32021	18.7958	19.9548
			H2	36.8306	25.203	10.9936
			H2	19.0567	-17.134	11.0826
			H2	40.1459	16.8532	14.5258
			H2	13.6219	14.229	-19.8664
			H2	17.9507	-14.095	20.0291
			H2	3.22593	-22.4961	-19.9846
			H2	-12.376	17.1273	-11.0417
			H2	5.33587	-25.046	-11.0183
			H2	-10.1526	-8.3734	19.8965
			H2	-40.2611	-19.2883	-11.0269
			H2	8.72029	-16.8237	-14.5481
			H2	8.68296	-19.3062	-11.0362
			H2	17.9227	14.197	-19.9758
			H2	13.6506	-14.0477	19.9654
			H2	36.7771	18.788	19.9972
			H2	21.2648	-15.9485	14.5789
			H2	19.0599	4.74728	-19.8495
			H2	34.6897	26.4237	14.5166
			H2	-10.1856	15.982	-14.5581
			H2	-12.3906	-4.7043	19.8548
			H2	-34.649	-22.4543	-20.0259
			H2	-21.1773	-8.419	19.9154
			H2	3.30956	-26.3145	-14.5887
			H2	5.33496	-18.7461	-19.9356
			H2	-36.7942	-25.1497	-10.9817
			H2	-19.0583	17.1433	-11.0696
			H2	-40.2616	-16.8017	-14.5391
			H2	-13.635	-14.1381	19.8545
			H2	-17.882	14.0738	-19.9657
			H2	-3.17785	22.527	20.0397
			H2	12.3717	-17.1288	11.0448
			H2	-5.2957	25.1666	11.0377
			H2	10.268	8.37145	-19.854
[truncated: 1,674 more rows]
